# Supplementary material for: A booster dose of an inactivated SARS-CoV-2 vaccine increases neutralizing antibodies and T cells that recognize Delta and Omicron variants of concern
Source: bioRxiv or medRxiv preprint supplement (doi:10.1101/2021.11.16.21266350), 2022-02-07

# Supp Fig 1

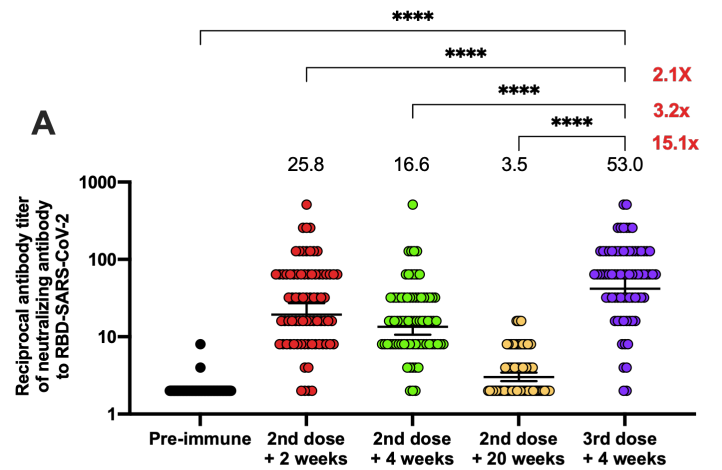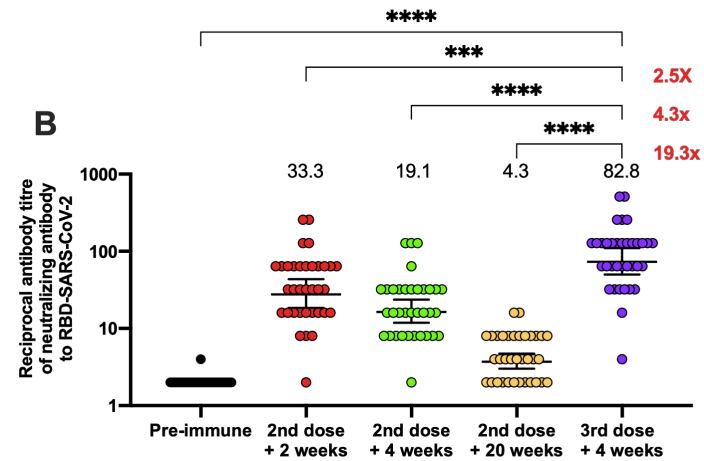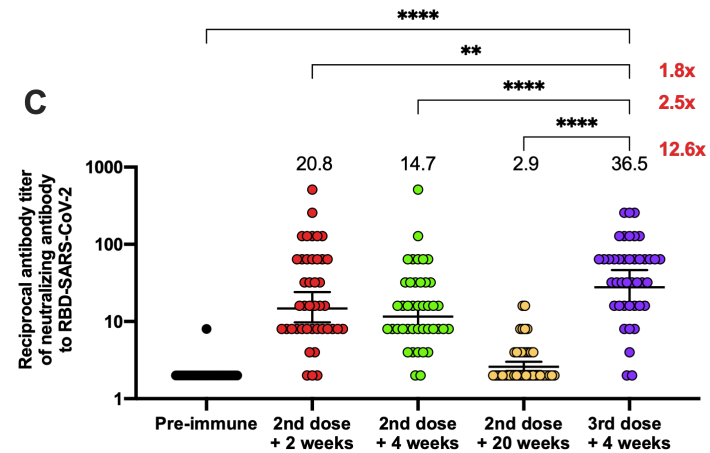

# Supp Fig 2

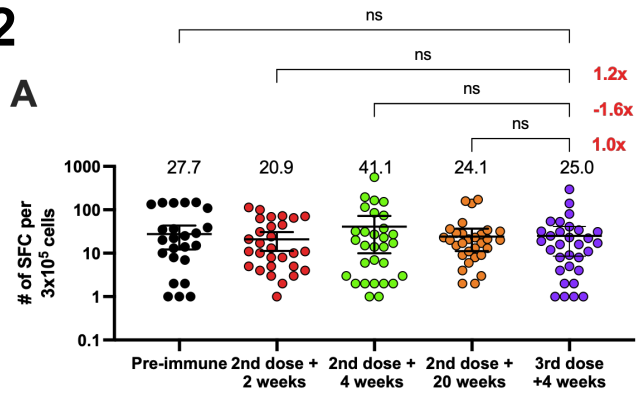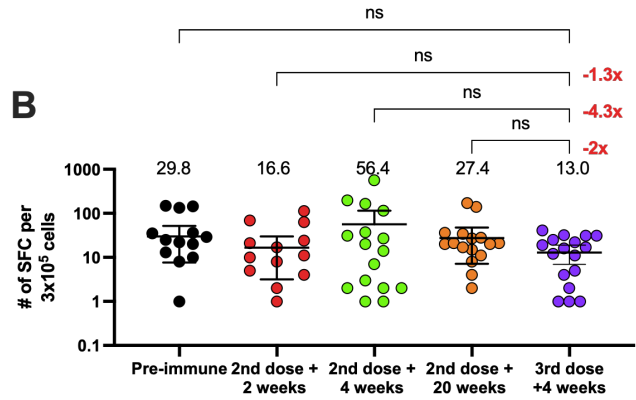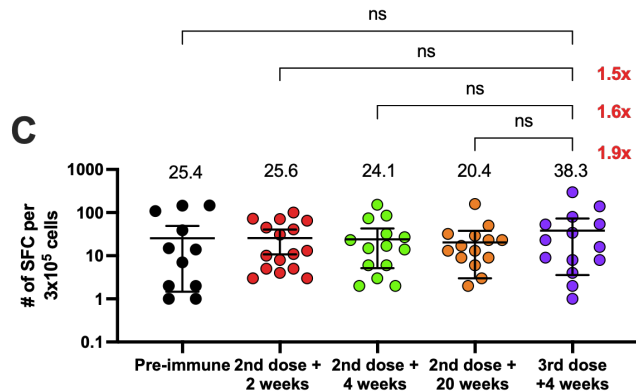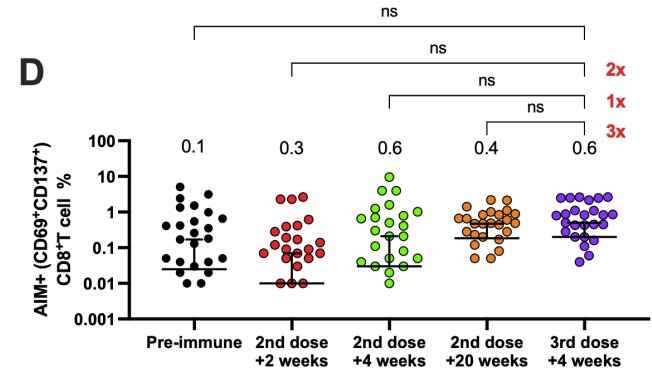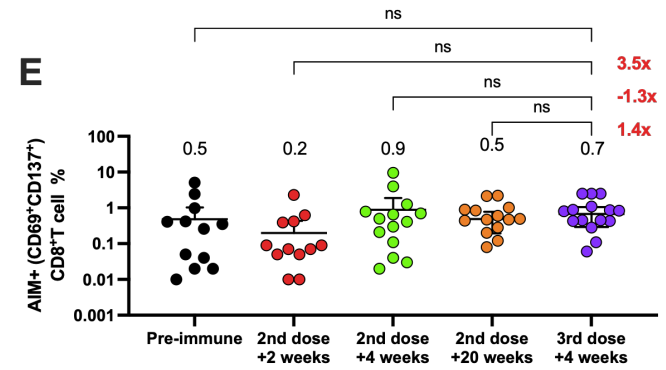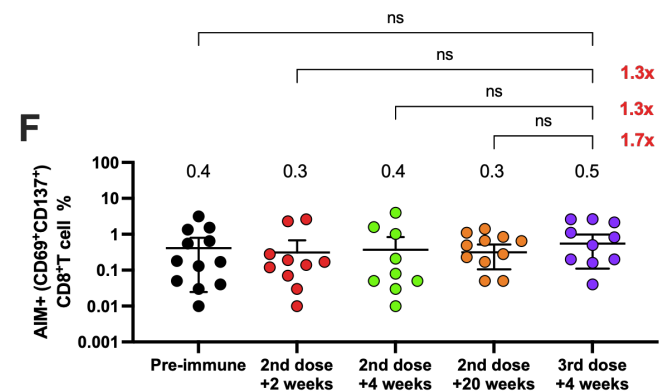

# Supp Fig 3

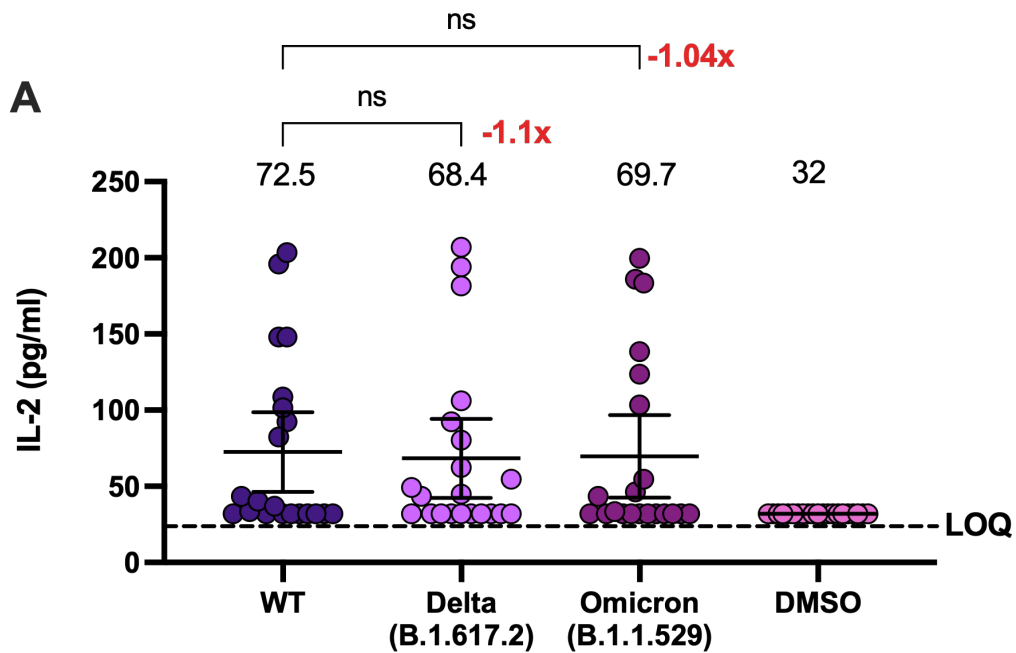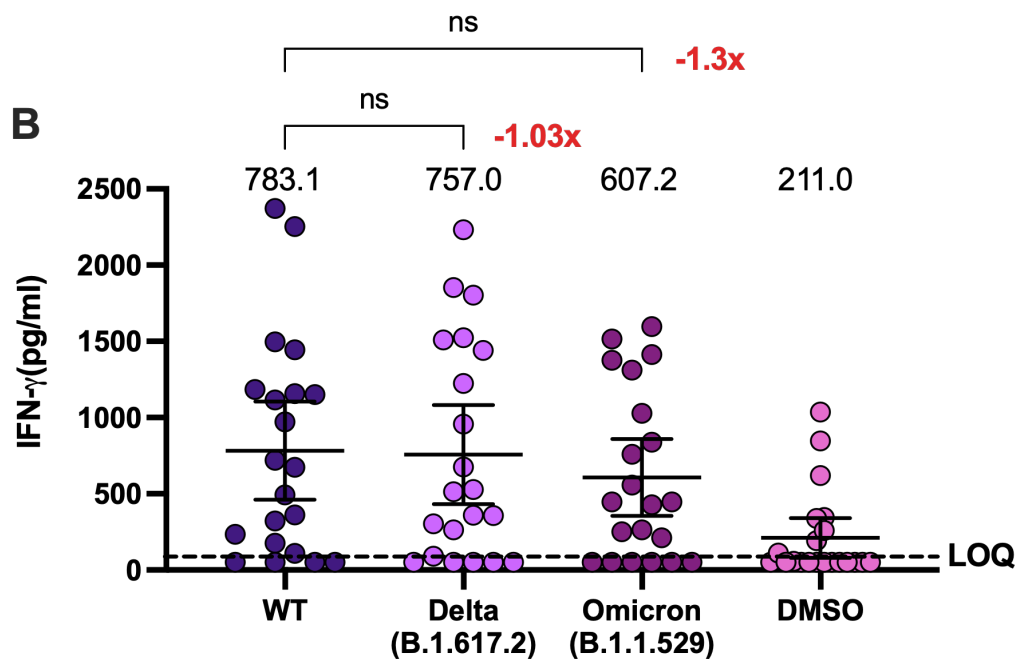

# Supp Fig 4

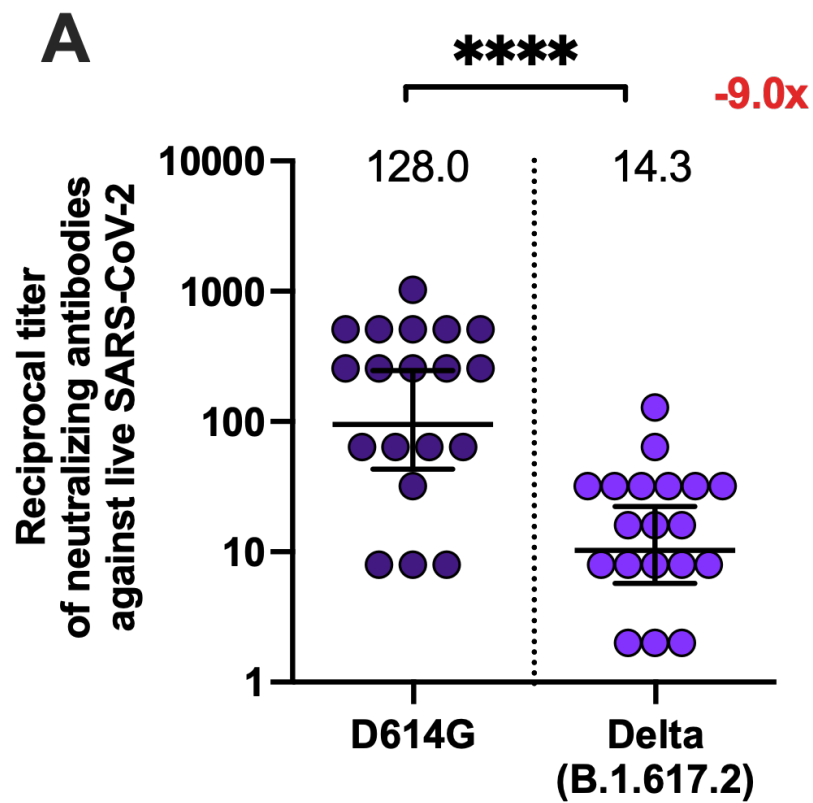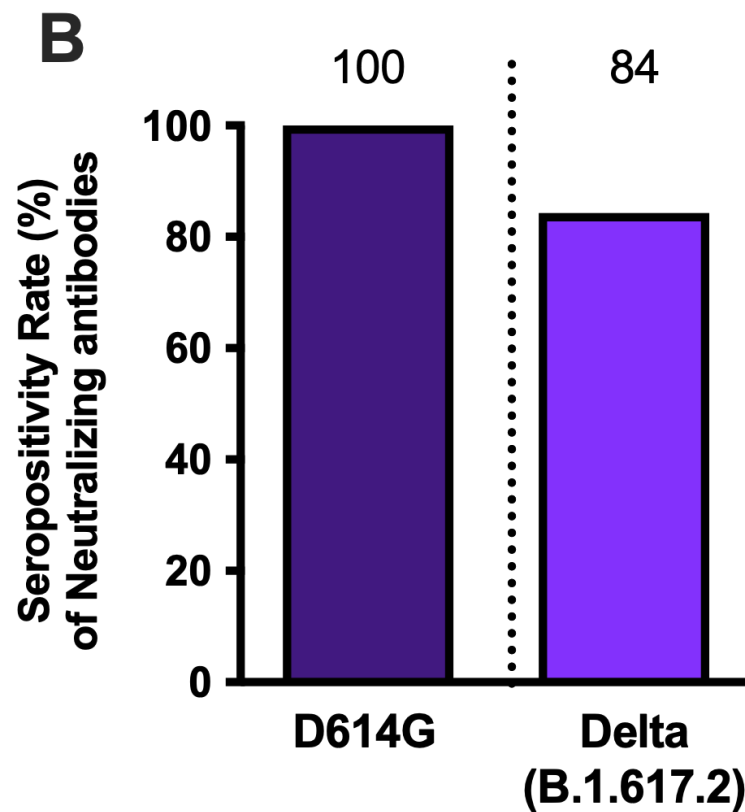

Supplement: Supplementary file [file media-2.pdf]
